# Supplementary material for: Profile of Innate Immunity in Gilthead Seabream Larvae Reflects Mortality upon Betanodavirus Reassortant Infection and Replication
Source: MDPI journal article supplement (doi:10.3390/ijms23095092), 2022-05-03
Supplement: s1 [file s1]

**Table S1:** Data of the principal component analysis with the Varimax rotation method. Correlations higher than 0.5 are in bold.

|          |               | Component     |               |
|----------|---------------|---------------|---------------|
|          |               | 1             | 2             |
| Gene     | <i>rdrp</i>   | -0.028        | <b>0.687</b>  |
|          | <i>cp</i>     | -0.053        | <b>0.659</b>  |
|          | <i>mx</i>     | <b>0.946</b>  | -0.068        |
|          | <i>mda5</i>   | <b>0.924</b>  | 0.199         |
|          | <i>hsp70</i>  | <b>0.933</b>  | 0.106         |
|          | <i>il1b</i>   | 0.414         | <b>0.511</b>  |
|          | <i>il8</i>    | 0.261         | <b>0.58</b>   |
|          | <i>nccrp1</i> | <b>0.750</b>  | 0.405         |
|          | <i>hamp</i>   | 0.289         | <b>-0.67</b>  |
|          | <i>nkl</i>    | <b>0.874</b>  | -0.253        |
|          | <i>prf</i>    | <b>0.901</b>  | -0.254        |
|          | <i>gzma</i>   | <b>0.901</b>  | 0.194         |
|          | <i>gzmb</i>   | <b>0.964</b>  | -0.055        |
| Survival |               | <b>-0.746</b> | <b>-0.535</b> |

**Table S2:** Primers used for real-time PCR analysis.

| Gene name                                      | Gene abbreviation | Accession number                 | Primer sequence (5' → 3')                         |
|------------------------------------------------|-------------------|----------------------------------|---------------------------------------------------|
| Nodavirus RNA-dependent polymerase             | <i>rdrp</i>       | AF319555                         | GTGTCCGGAGAGGTTAAGGATG<br>CTTGAATTGATCAACGGTGAACA |
| Nodavirus coat protein                         | <i>cp</i>         | D38636                           | CAACTGACAACGATCACACCTTC<br>CAATCGAACACTCCAGCGACA  |
| Elongation factor 1 alpha                      | <i>ef1a</i>       | AF184170                         | CTTCAACGCTCAGGTCATCAT<br>GCACAGCGAAACGACCAAGGGGA  |
| Interferon-induced protein Mx                  | <i>mx</i>         | FJ490556<br>FJ490555<br>FJ652200 | AAGAGGAGGACGAGGAGGAG<br>CATCCCAGATCCTGGTCAGT      |
| Melanoma differentiation-associated protein 5  | <i>mda5</i>       | HS988207                         | CATCGAGATCATCGAGGACA<br>CCAGATGTCGCTCTTGAAGG      |
| Interleukin 1 beta                             | <i>il1b</i>       | AJ277166                         | GGGCTGAACAACAGCACTCTC<br>TTAACACTCTCCACCCTCCA     |
| Interleukin 8                                  | <i>il8</i>        | AM765841                         | GCCACTCTGAAGAGGACAGG<br>TTTGTTGTCTTTGGTCGAA       |
| Heat-shock protein 70                          | <i>hsp70</i>      | EU805481                         | AATGTTCTGCGCATCATCAA<br>GCCTCCACCAAGATCAAAGA      |
| Non-specific cytotoxic cell receptor protein 1 | <i>nccrp1</i>     | AY651258                         | ACTTCCTGCACCGACTCAAG<br>TAGGAGCTGGTTTTGGTTGG      |
| Granzyme A                                     | <i>gzma</i>       | MK568066                         | GCTGCTCGGAGTCACTTCTT<br>GGATCCAGGTGAGCTGCTTT      |
| Granzyme B                                     | <i>gzmb</i>       | AM957224                         | GAAACAAAGGAACGGGTCAA<br>GAGCTGTCCATCTTTTGCTTG     |
| Perforin                                       | <i>prf</i>        | AM950868                         | CAGACCATGAGGGGAACACT<br>TGGAACCATGCAACACCTTA      |
| NK-lysin                                       | <i>nkl</i>        | MN240490                         | CGCACCTCGGAGAACTGATT<br>TCCACGTCGCTTCGGTAAAA      |
| Hepcidin                                       | <i>hamp</i>       | CB184616                         | GCCATCGTGCTCACCTTTAT<br>CTGTTGCCATACCCCATCTT      |
